# Supplementary material for: High-water-content graphene oxide/polyvinyl alcohol hydrogel with excellent mechanical properties
Source: Royal Society of Chemistry journal article supplement (doi:10.1039/c4ta01464b), 2014-01-01
Supplement: c4ta01464b1.pdf [file c4ta01464b1.pdf]

## Supplementary Information

### **High-water-content Graphene oxide/Polyvinyl alcohol Hydrogel with Excellent Mechanical Properties**

Yi-Fu Huang<sup>a, b</sup>; Ming-Qiu Zhang<sup>\*b</sup>; Wen-Hong Ruan<sup>\*b</sup>

<sup>a</sup> Key Laboratory for Polymeric Composite and Functional Materials of Ministry of Education, DSAPM Laboratory, School of Chemistry and Chemical Engineering, Sun Yat-sen University, Guangzhou 510275, China

<sup>b</sup> Materials Science Institute, School of Chemistry and Chemical Engineering, Sun Yat-sen University, Guangzhou 510275, China

\*Corresponding authors: cesrwh@mail.sysu.edu.cn, ceszmq@mail.sysu.edu.cn

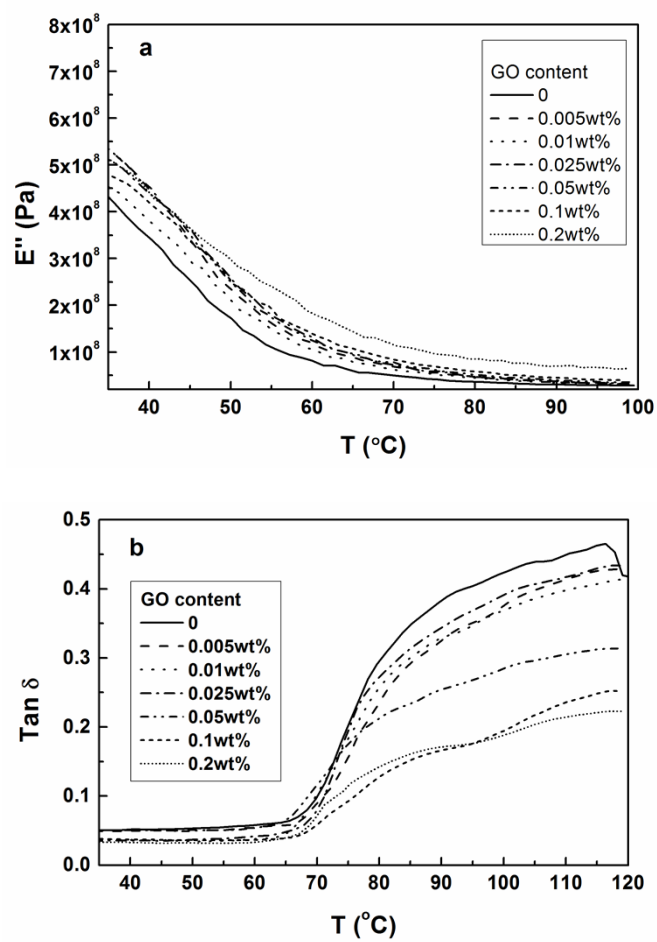

**Fig. 1S.** DMA spectra of (a) loss modulus ( $\tan \delta$ ) of GO/PVA and PVA samples; (b) loss tangent ( $E''$ ) of B-GO/PVA and B-PVA samples.

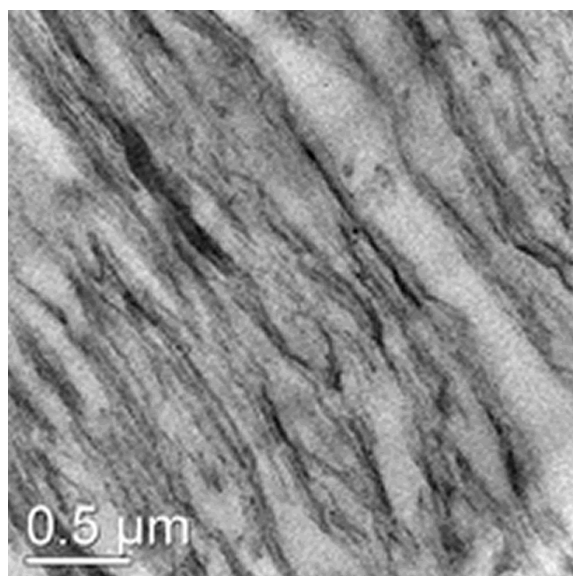

**Fig. 2S.** A TEM image of cross-sectional area of 0.2wt % B-GO/PVA hydrogel

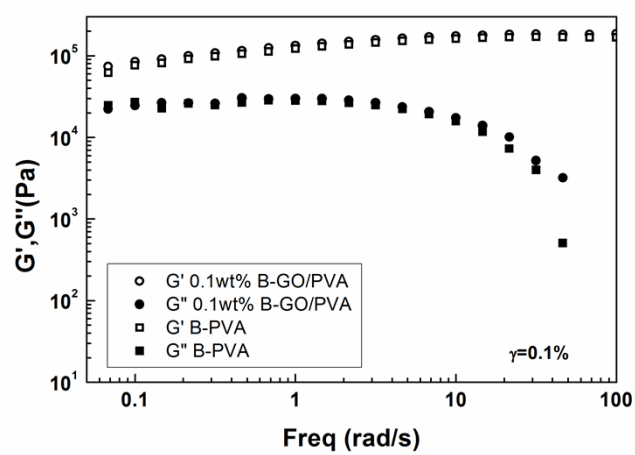

**Fig. 3S.** Dynamic rheological properties of frequency sweeps of B-PVA and 0.1wt%B-GO/PVA hydrogels:  $\gamma=0.1\%$ , frequency range (0.01 to 100 rad/s)

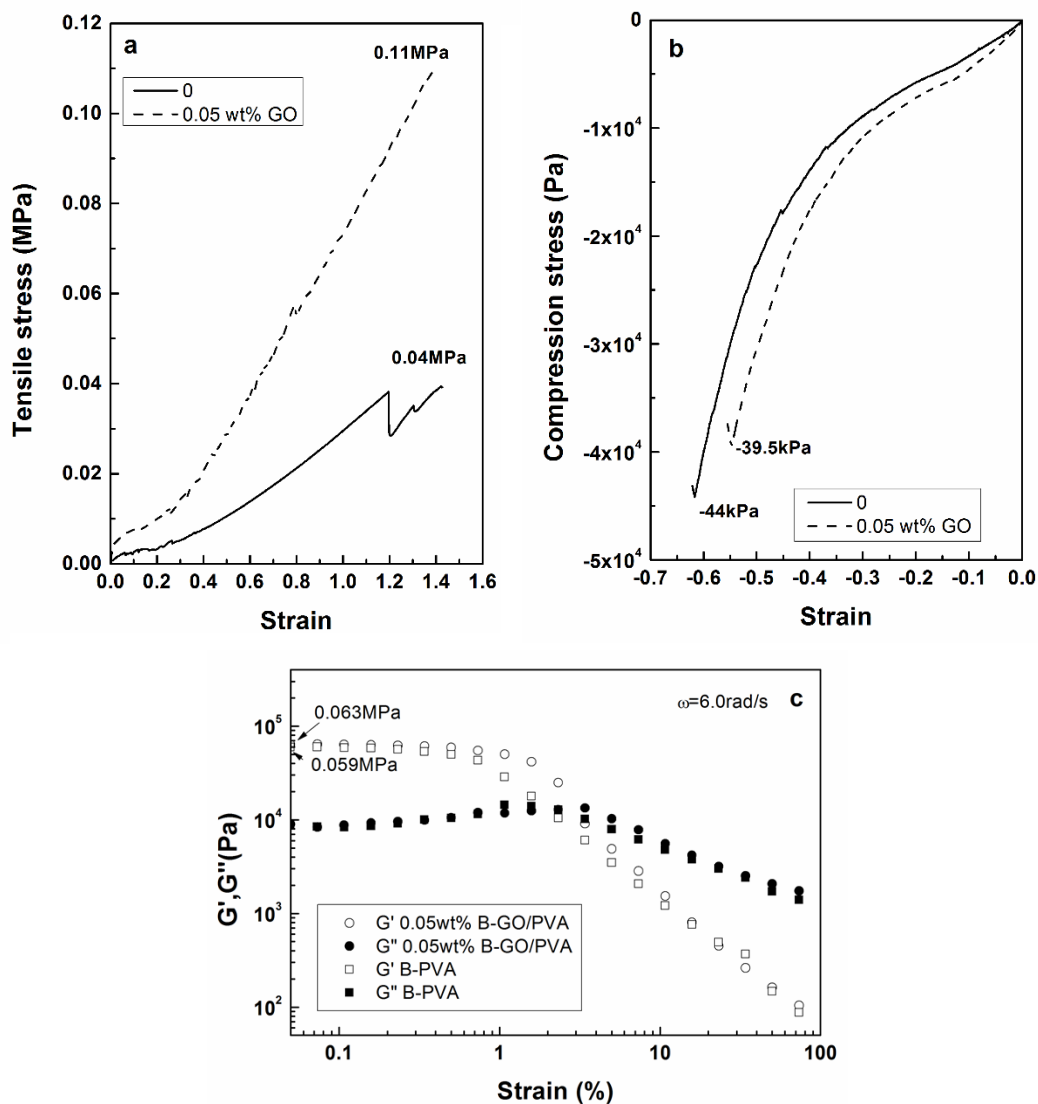

**Fig. 4S.** Curves of mechanical properties of B-PVA and 0.05wt% B-GO/PVA hydrogels (water content ~98%): (a) tensile test; (b) compression; (c) dynamic shear
